# Supplementary material for: Perceived Benefits and Harms of the COVID-19 Pandemic on Family Well-Being and Their Sociodemographic Disparities in Hong Kong: A Cross-Sectional Study
Source: PubMed Central journal article supplement (PMC7908477; doi:10.3390/ijerph18031217), 2021-01-29
Supplement: ijerph-18-01217-s001.pdf [file ijerph-18-01217-s001.pdf]

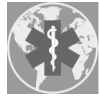

Supplementary 1. Perceived benefits and harms of COVID-19 by education, housing and family income

|                                                      | Education          |                    | P value          | Housing           |                    | P value      | Household income (by household size) |                                     | P value          |
|------------------------------------------------------|--------------------|--------------------|------------------|-------------------|--------------------|--------------|--------------------------------------|-------------------------------------|------------------|
|                                                      | Secondary or lower | Post-secondary     |                  | Rent              | Owned              |              | <=Median HK household monthly income | >Median HK household monthly income |                  |
|                                                      | n (%)              | n (%)              |                  | n (%)             | n (%)              |              | n (%)                                | n (%)                               |                  |
| <b>Perceived benefits</b>                            |                    |                    |                  |                   |                    |              |                                      |                                     |                  |
| <b>Family physical health (any of the following)</b> | <b>94 (15.1)</b>   | <b>934 (23.9)</b>  | <b>&lt;0.001</b> | <b>317 (21.2)</b> | <b>687 (23.6)</b>  | <b>0.08</b>  | <b>249 (21.2)</b>                    | <b>660 (23.4)</b>                   | <b>0.12</b>      |
| Improved family hygiene                              | 89 (14.3)          | 837 (21.4)         | <0.001           | 292 (19.5)        | 613 (21.0)         | 0.23         | 224 (19.0)                           | 595 (21.1)                          | 0.13             |
| Improved family physical health                      | 53 (8.5)           | 548 (14.0)         | <0.001           | 178 (11.9)        | 407 (14.0)         | 0.06         | 142 (12.1)                           | 389 (13.8)                          | 0.14             |
| <b>Family mental health (any of the following)</b>   | <b>32 (5.2)</b>    | <b>336 (8.6)</b>   | <b>0.004</b>     | <b>127 (8.5)</b>  | <b>231 (8.0)</b>   | <b>0.51</b>  | <b>80 (6.8)</b>                      | <b>248 (8.9)</b>                    | <b>0.03</b>      |
| Decreased family negative emotion                    | 12 (1.9)           | 67 (1.7)           | 0.69             | 31 (2.1)          | 45 (1.6)           | 0.20         | 17 (1.5)                             | 53 (1.9)                            | 0.34             |
| Increased family positive emotion                    | 24 (3.9)           | 167 (4.3)          | 0.63             | 54 (3.6)          | 130 (4.5)          | 0.18         | 50 (4.3)                             | 122 (4.4)                           | 0.90             |
| Increased family happiness                           | 18 (2.9)           | 220 (5.6)          | 0.005            | 81 (5.4)          | 151 (5.2)          | 0.74         | 45 (3.8)                             | 166 (5.9)                           | 0.008            |
| <b>Family relationship (any of the following)</b>    | <b>65 (10.5)</b>   | <b>682 (17.5)</b>  | <b>&lt;0.001</b> | <b>248 (16.6)</b> | <b>483 (16.6)</b>  | <b>1.00</b>  | <b>147 (12.6)</b>                    | <b>516 (18.4)</b>                   | <b>&lt;0.001</b> |
| Increased family harmony                             | 35 (5.6)           | 367 (9.4)          | 0.002            | 130 (8.7)         | 263 (9.0)          | 0.71         | 77 (6.6)                             | 280 (10.0)                          | 0.001            |
| Increased family's ability to cope with difficulties | 54 (8.7)           | 499 (12.7)         | 0.004            | 182 (12.1)        | 357 (12.2)         | 0.93         | 116 (9.8)                            | 376 (13.3)                          | 0.002            |
| <b>Perceived harms</b>                               |                    |                    |                  |                   |                    |              |                                      |                                     |                  |
| <b>Poorer family physical health</b>                 | <b>13 (2.2)</b>    | <b>116 (3.0)</b>   | <b>0.24</b>      | <b>46 (3.2)</b>   | <b>80 (2.8)</b>    | <b>0.54</b>  | <b>45 (3.9)</b>                      | <b>60 (2.2)</b>                     | <b>0.002</b>     |
| <b>Family mental health (any of the following)</b>   | <b>239 (40.2)</b>  | <b>1377 (36.4)</b> | <b>0.070</b>     | <b>536 (37.0)</b> | <b>1034 (36.7)</b> | <b>0.85</b>  | <b>422 (37.1)</b>                    | <b>982 (35.9)</b>                   | <b>0.50</b>      |
| Increased family negative emotion                    | 208 (35.0)         | 1221 (32.2)        | 0.17             | 485 (33.4)        | 902 (32.0)         | 0.35         | 379 (33.3)                           | 856 (31.3)                          | 0.22             |
| Decreased family happiness                           | 118 (19.7)         | 614 (16.1)         | 0.03             | 256 (17.6)        | 458 (16.2)         | 0.24         | 203 (17.7)                           | 424 (15.4)                          | 0.07             |
| <b>Family relationship (any of the following)</b>    | <b>113 (18.9)</b>  | <b>746 (19.6)</b>  | <b>0.67</b>      | <b>297 (20.4)</b> | <b>542 (19.2)</b>  | <b>0.33</b>  | <b>243 (21.3)</b>                    | <b>499 (18.2)</b>                   | <b>0.022</b>     |
| Decreased family harmony                             | 73 (12.2)          | 431 (11.3)         | 0.54             | 186 (12.8)        | 302 (10.7)         | 0.04         | 140 (12.3)                           | 286 (10.4)                          | 0.09             |
| Decreased family's ability to cope with difficulties | 15 (2.5)           | 98 (2.6)           | 0.92             | 51 (3.5)          | 58 (2.0)           | 0.004        | 32 (2.8)                             | 59 (2.1)                            | 0.22             |
| Increased family conflicts                           | 77 (12.9)          | 597 (15.7)         | 0.08             | 223 (15.3)        | 435 (15.3)         | 0.95         | 191 (16.7)                           | 393 (14.3)                          | 0.06             |
| <b>Decreased family income</b>                       | <b>255 (42.6)</b>  | <b>1183 (31.0)</b> | <b>&lt;0.001</b> | <b>528 (36.2)</b> | <b>876 (30.9)</b>  | <b>0.001</b> | <b>437 (38.1)</b>                    | <b>794 (28.9)</b>                   | <b>&lt;0.001</b> |

Missing data was excluded. Data was unweighted.
